# Supplementary material
Source: PubMed Central journal article supplement (PMC1174792)
Supplement: pbio.0030196.st002.pdf [file pbio.0030196.st002.pdf]

**Table S2.** The accessions used in the project: individual accessions.

| accession | region          | population             | latitude | longitude | origin                 | stock center |
|-----------|-----------------|------------------------|----------|-----------|------------------------|--------------|
| Cvi-0     | Cape Verde Isl. | Cape Verde Isl.        | 16       | -24       | CS6675                 | CS22614      |
| Lz-0      | France          | Puy-de-Dome            | 46       | 3.3       | CS6788                 | CS22615      |
| Ei-2      | Germany         | Eifel                  | 50.3     | 6.3       | CS6689                 | CS22616      |
| Gu-0      | Germany         | Guckingen              | 50.3     | 8         | CS6730                 | CS22617      |
| Ler-1     | Poland          | Landsberg              | 52-53    | 15-16     | CS6928                 | CS22618      |
| Nd-1      | Germany         | Niederzenz             | 51 (NA)  | 10        | CS6922                 | CS22619      |
| C24       | Portugal        | Coimbra                | 40.12    | -8.25     | CS906                  | CS22620      |
| CS22491   | Russia          | Konchezero             | 61.36    | 34.15     | CS22491                | CS22621      |
| Wei-0     | Switzerland     | Weiningen              | 47.25    | 8.26      | CS6182                 | CS22622      |
| Ws-0      | Ukraine         | (Wassilewskija)/Djnepr | 52.3     | 30        | CS6891                 | CS22623      |
| Yo-0      | USA             | Yosemite Nat. Park     | 37.45    | -119.35   | CS6901                 | CS22624      |
| Col-0     | USA (Germany?)  | Columbia               | 38.3     | -92.3     | S. Somerville (CS6673) | CS22625      |
| An-1      | Belgium         | Antwerpen              | 51.3     | 4.3       | CS6603                 | CS22626      |
| Van-0     | Canada          | UBC, Vancouver         | 49.3     | -123      | CS6884                 | CS22627      |
| Br-0      | Czech Republic  | Brno (Brunn)           | 49       | 16.3      | CS6626                 | CS22628      |
| Est-1     | Estland         | Estland                | 58.3     | 25.3      | CS6701                 | CS22629      |
| Ag-0      | France          | Argentat               | 45       | 1.3       | CS6601                 | CS22630      |
| Gy-0      | France          | La Miniere             | 49       | 2         | CS6732                 | CS22631      |
| Ra-0      | France          | Randan, Puy-de-Dome    | 46       | 3.3       | CS6844                 | CS22632      |
| Bay-0     | Germany         | Bayreuth               | 49       | 11        | CS6608                 | CS22633      |
| Ga-0      | Germany         | Gabelstein             | 50.3     | 8         | CS6714                 | CS22634      |
| Mrk-0     | Germany         | Markt/Baden            | 49       | 9.3       | CS6796                 | CS22635      |
| Mz-0      | Germany         | Merzhausen/Ts.         | 50.3     | 8.3       | CS6800                 | CS22636      |
| Wt-5      | Germany         | Wietze                 | 52.3     | 9.3       | CS6896                 | CS22637      |
| Kas-2     | India           | Kashmir                | 35       | 77        | S. Somerville (CS6751) | CS22638      |
| Ct-1      | Italy           | Catania                | 37.3     | 15        | CS6674                 | CS22639      |
| Mr-0      | Italy           | Monte/Tosso            | 44.3     | 9.3       | CS6795                 | CS22640      |
| Tsu-1     | Japan           | Tsushima               | 34.43    | 136.31    | J. Borevitz (CS6926)   | CS22641      |
| Mt-0      | Libya           | Martubad/Cyrenaika     | 33       | 23        | CS6799                 | CS22642      |
| Nok-3     | Netherlands     | Noordwijk              | 52.3     | 4         | CS6810                 | CS22643      |
| Wa-1      | Poland          | Warsaw                 | 52.3     | 21        | S. Somerville (CS6885) | CS22644      |
| Fei-0     | Portugal        | St. Maria d. Feiria    | 40 (NA)  | -8        | C. Alonso-Blanco       | CS22645      |
| Se-0      | Spain           | San Eleno              | 41.3     | 2.3       | CS6852                 | CS22646      |
| Ts-1      | Spain           | Tossa de Mar           | 41.3     | 3         | CS6868                 | CS22647      |
| Ts-5      | Spain           | Tossa de Mar           | 41.3     | 3         | CS6871                 | CS22648      |
| Pro-0     | Spain           | Proaza, Asturias       | 43.15    | -6        | C. Alonso-Blanco       | CS22649      |
| LL-0      | Spain           | Llagostera             | 41.59    | 2.49      | C. Alonso-Blanco       | CS22650      |
| Kondara   | Tajikistan      | Pamiro-Alay            | 38.35    | 68.48     | CS6175                 | CS22651      |
| Shahdara  | Tajikistan      | Pamiro-Alay            | 38.35    | 68.48     | CS6180                 | CS22652      |
| Sorbo     | Tajikistan      | Pamiro-Alay            | 38.35    | 68.48     | CS931                  | CS22653      |
| Kin-0     | USA             | Kindalville, MI        | 44.46    | -85.37    | CS6755                 | CS22654      |
| Ms-0      | Russia          | Moscow                 | 56       | 38        | CS6797                 | CS22655      |
| Bur-0     | Ireland         | Burren                 | 53.3     | -8        | CS6643                 | CS22656      |
| Edi-0     | Scotland        | Edinburgh              | 56       | -3        | CS6688                 | CS22657      |
| Oy-0      | Norway          | Oystese                | 60.23    | 6.13      | CS6824                 | CS22658      |
| Ws-2      | Ukraine         | (Wassilewskija)/Djnepr | 52.3     | 30        | CS2360                 | CS22659      |
